# Supplementary material for: MetaboAnalyst 3.0—making metabolomics more meaningful
Source: PubMed Central journal article supplement (PMC4489235; doi:10.1093/nar/gkv380), 2015-04-20
Supplement: supp_gkv380_nar-00212-web-b-2015-File004.pdf [file supp_gkv380_nar-00212-web-b-2015-File004.pdf]

Mar 1, 2015 - Mar 31, 2015

# Audience Overview

All Sessions  
100.00%

Overview

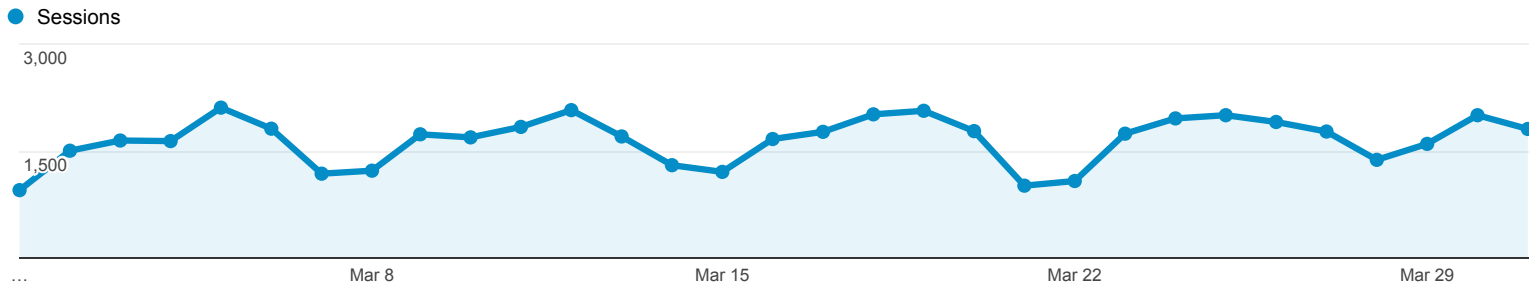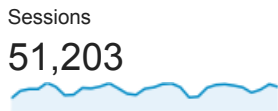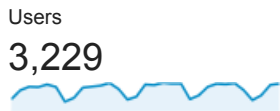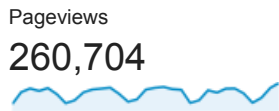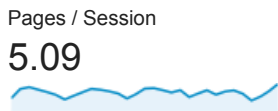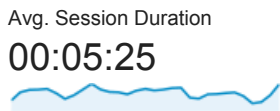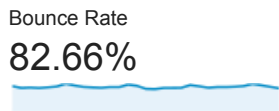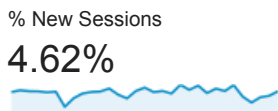

Returning Visitor New Visitor

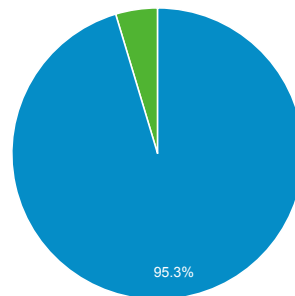

| Language  | Sessions | % Sessions |
|-----------|----------|------------|
| 1. en-us  | 32,237   | 62.96%     |
| 2. zh-cn  | 5,432    | 10.61%     |
| 3. en-gb  | 2,113    | 4.13%      |
| 4. de     | 1,866    | 3.64%      |
| 5. ja     | 1,271    | 2.48%      |
| 6. fr     | 1,236    | 2.41%      |
| 7. pt-br  | 934      | 1.82%      |
| 8. es     | 711      | 1.39%      |
| 9. zh-tw  | 688      | 1.34%      |
| 10. ko-kr | 670      | 1.31%      |

Oct 1, 2014 - Mar 31, 2015

# Audience Overview

All Sessions  
100.00%

## Overview

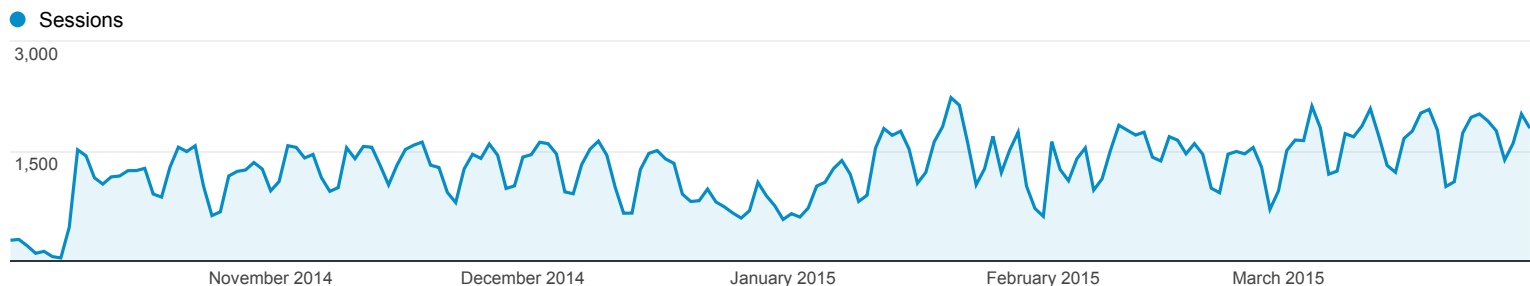

Sessions  
**232,440**

Users  
**12,061**

Pageviews  
**1,141,978**

Pages / Session  
**4.91**

Avg. Session Duration  
**00:05:07**

Bounce Rate  
**82.03%**

% New Sessions  
**4.77%**

■ Returning Visitor ■ New Visitor

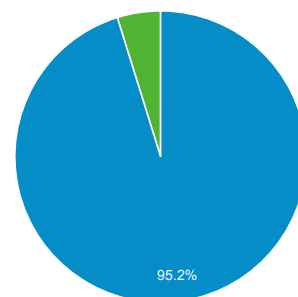

| Language | Sessions | % Sessions |
|----------|----------|------------|
| 1. en-us | 142,572  | 61.34%     |
| 2. zh-cn | 25,843   | 11.12%     |
| 3. de    | 9,179    | 3.95%      |
| 4. en-gb | 8,678    | 3.73%      |
| 5. pt-br | 6,522    | 2.81%      |
| 6. zh-tw | 4,823    | 2.07%      |
| 7. ko-kr | 4,332    | 1.86%      |
| 8. fr    | 3,883    | 1.67%      |
| 9. ja    | 3,149    | 1.35%      |
| 10. es   | 3,086    | 1.33%      |
